1 **Convergent inactivation of the skin-specific C-C motif chemokine ligand 27 in**  
2 **mammalian evolution**

3  
4 Mónica Lopes-Marques<sup>1+\*</sup>, Luís Q. Alves<sup>1,2+</sup>, Miguel M. Fonseca<sup>1</sup>, Giulia Secci-  
5 Petretto<sup>1,2</sup>, André M. Machado<sup>1,2</sup>, Raquel Ruivo<sup>1\*</sup> and L. Filipe C. Castro<sup>1,2\*</sup>

6  
7 <sup>1</sup>CIIMAR – Interdisciplinary Centre of Marine and Environmental Research, U. Porto –  
8 University of Porto, Porto, Portugal

9 <sup>2</sup>Department of Biology, Faculty of Sciences, U. Porto - University of Porto, Portugal

10  
11 <sup>+</sup>These authors contributed equally to this work

12  
13 <sup>\*</sup>To whom correspondence should be addressed:

14 L. Filipe C. Castro, Raquel Ruivo and Mónica Lopes-Marques

15 CIIMAR, Av. General Norton de Matos s/n; 4450-208, Matosinhos, Portugal

16 phone (+351) 22 3401800

17 Email: [filipe.castro@ciimar.up.pt](mailto:filipe.castro@ciimar.up.pt) ; [ruivo.raquel@gmail.com](mailto:ruivo.raquel@gmail.com); [monicaslm@hotmail.com](mailto:monicaslm@hotmail.com)

18  
19 Running title: CCL27 gene loss in mammals

20 Keywords: chemokines, gene loss, skin, inflammation

21

22

23 **Abstract**

24 The appearance of mammalian-specific skin features was a key evolutionary event  
25 contributing for the elaboration of physiological processes such as thermoregulation,  
26 adequate hydration, locomotion and inflammation. Skin inflammatory and autoimmune  
27 processes engage a population of skin-infiltrating T cells expressing a specific C-C  
28 chemokine receptor (CCR10), which interacts with an epidermal CC chemokine, the skin-  
29 specific C-C motif chemokine ligand 27 (CCL27). CCL27 is selectively produced in the  
30 skin by keratinocytes, particularly upon inflammation, mediating the adhesion and  
31 homing of skin-infiltrating T cells. Here, we examined the evolution and coding condition  
32 of *Ccl27* in 112 placental mammalian species. Our findings reveal that a number of open  
33 reading frame inactivation events such as insertions, deletions, start and stop codon  
34 mutations, independently occurred in Cetacea, Pholidota, Sirenia, Chiroptera, and  
35 Rodentia, totalizing 18 species. The diverse habitat settings and life-styles of *Ccl27*-  
36 eroded lineages probably implied distinct evolutionary triggers rendering this gene  
37 unessential. For example, in Cetacea the rapid renewal of skin layers minimizes the need  
38 for an elaborate inflammatory mechanism, mirrored by the absence of epidermal scabs.  
39 Our findings suggest that the convergent and independent loss of *Ccl27* in mammalian  
40 evolution concurred with unique adaptive roads for skin physiology.

## 41 **Introduction**

42 The mammalian skin performs a plethora of biological functions, including that of acting  
43 as a protective barrier from external harmful insults, such as invading pathogens and  
44 noxious stimuli. In this context, the role of the immune system is fundamental, involving  
45 a coherent and highly coordinated network of innate and adaptive components to ensure  
46 an adequate response to ensure homeostasis [1, 2]. Chemokines, a superfamily of  
47 polypeptides, are central in the unfolding of immune and inflammatory responses, serving  
48 as chemoattractant signals that drive the movements of immune cells in response to  
49 stimuli. In the skin, a tissue-specific T cell homing chemokine has been described.  
50 Initially named as the cutaneous T cell-attracting chemokine, C-C motif chemokine  
51 ligand 27 (CCL27, also known as ESkin, ALP, ILC or ILR $\alpha$  locus chemokine [3-5])  
52 plays a central role in the skin homing process [6]. *Ccl27* maps to human chromosome 9  
53 in a tandem gene arrangement with two other chemokines, *Ccl19* and *Ccl21* and presents  
54 two alternative transcripts, yielding secreted and intracellular forms (Figure 1) [3, 7]. The  
55 latter, designated PESKY, includes a different exon 1 and acts as an intracellular  
56 chemokine (Figure 1) [7]. PESKY transcripts may be found in various mucosal tissues  
57 [8, 9], but CCL27 secretion is mostly restricted to skin keratinocytes, having a critical  
58 role in skin homeostasis [6, 10]. To provide a skin-specific cue to attract memory T cells  
59 in normal or inflamed skin, CCL27 specifically binds to the CCR10 receptor *in vivo* [6,  
60 10]. While CCL27 is exclusive towards CCR10 receptor, other chemokines such as CCL8  
61 also bind CCR10 [6, 9, 10].

62 While a number of key morpho-functional skin components have been conserved  
63 throughout mammalian evolution, specific lineages experienced secondary episodes of  
64 phenotypic simplification or/and elaboration (e.g. [11, 12]). In this context, Cetacea offer  
65 an illustrative example, with the exclusive aquatic dependence underscoring unique

66 anatomical signatures (e.g. [12, 13]). For example, their skin is smooth with no pelage,  
67 presenting a thick stratum corneum, while the upper layers of the epidermis are not fully  
68 cornified [14-16]. Moreover, to improve smoothness and reduce drag, Cetacea skin is  
69 rapidly renewed [15, 17, 18]. This intensive cellular replacement and epidermal thickness  
70 reduce scab formation and the risk of pathogen invasion [14, 16, 18]. Accordingly, skin  
71 inflammation is apparently reduced in Cetacea [18]. The underlying genomic events  
72 connected with skin repair mechanisms and whether other mammalian lineages display  
73 similar traits is presently unknown. The growing number of full genome sequences  
74 currently available have provided valuable insights into the role of gene loss as the  
75 foundation for phenotypic alterations and consequently on the perception of adaptive  
76 landscapes [11, 12, 19-22]. Given the key role of CCL27 in the process of skin  
77 inflammation, we hypothesized that the *Ccl27* coding sequence might be compromised  
78 in Cetacea as suggested by the overall skin inflammatory physiology observed in this  
79 lineage [15, 18].

80

## 81 **Results and Discussion**

82 To investigate the distribution and annotation tags of the *Ccl27* gene in mammals, we  
83 scrutinized a total of 114 selected mammalian genomes available at NCBI and Ensembl  
84 genome browsers (supplementary table 1). This search retrieved 14 *Ccl27* annotations  
85 tagged as “low-quality” (LQ) and uncovered 9 species with no *Ccl27* gene annotation  
86 (supplementary table 1). Next, we investigated the genomic sequences corresponding to  
87 the *Ccl27* LQ annotations to determine the CDS through manual annotation. This step  
88 revealed coding *Ccl27* genes, tagged as LQ for the following species: *Saimiri boliviensis*  
89 (black-capped squirrel monkey), *Galeopterus variegatus* (Sunda flying lemur),  
90 *Peromyscus maniculatus bairdii* (North American deer mouse), *Loxodonta Africana*

91 (African bush elephant), and *Chrysochloris asiatica* (Cape golden mole). Also, the  
92 analysis of the genomic sequence corresponding to the *Ccl27* locus in *Ochotona princeps*  
93 (American pika) showed that the missing annotation in this species is most probably due  
94 to poor genome coverage in this locus (not shown). Importantly, all cetacean species  
95 analysed presented sequences tagged as LQ or no *Ccl27* annotation. This impelled us to  
96 further explore other cetacean species with unannotated genomes: *Balaenoptera*  
97 *bonaerensis* (Antarctic minke whale), *Eschrichtius robustus* (gray whale), *Balaena*  
98 *mysticetus* (bowhead whale) and *Sousa chinensis* (Indo-Pacific humpback dolphin).

99

#### 100 ***Ccl27* gene sequence contains inactivating mutations in Cetacea**

101 Annotation of collected cetacean genomic sequences revealed *Ccl27* gene erosion across  
102 all analysed species (Figure 2A). In detail, gene sequence examination in Odontoceti  
103 showed a non-disruptive insertion of a codon in exon 2 in all species with the exception  
104 of *Lipotes vexillifer* (Yangtze river dolphin). In addition, in exon 2, a frameshift mutation  
105 (deletion of 1 nucleotide) was identified and validated by sequence read archive (SRA)  
106 analysis in *Physeter catodon* (sperm whale, supplementary material 1). A conserved  
107 premature stop codon was found in *Orcinus orca* (orca) and *Lagenorhynchus obliquidens*  
108 (Pacific white-sided dolphin), as well as a non-conserved premature stop codon in *L.*  
109 *vexillifer*. These observations were confirmed in *O. orca* and *L. obliquidens* through SRA  
110 analysis (supplementary material 1). In *L. vexillifer* exon 2 also presented a frameshift  
111 mutation (4 nucleotide deletion) and the loss of the canonical splice site (GT>CC). Next,  
112 in exon 3 a conserved premature stop codon was identified in all Odontoceti (Figure 2B,  
113 supplementary material 1). A frameshift mutation by deletion was identified in all species  
114 apart from *P. catodon*, which in turn shows a frameshift mutation before the identified  
115 stop codon (Figure 2B).

116 Regarding the Mysticeti, all identified mutations were conserved across all 4 analyzed  
117 species (Figure 2A and 2C). Non-disruptive mutations consisting in the deletion and  
118 insertion of 1 codon were identified in exon 1 and exon 2, respectively. Also, two  
119 conserved premature stop codons were identified in exon 2 and exon 3 (the former was  
120 validated by SRA, supplementary material 1), which were followed by a 1 nucleotide  
121 deletion identified in all analyzed species (Figure 2C black arrow). Interestingly, this 1  
122 nucleotide deletion is conserved among all cetacean species (supplementary material 2),  
123 suggesting that *Ccl27* pseudogenization preceded the divergence of Odonticeti and  
124 Mysticeti.

125

#### 126 **Transcriptomic analysis supports *Ccl27* gene erosion in Cetacea**

127 To further scrutinize the functional condition of *Ccl27*, we next analyzed multi-tissue  
128 RNA-Seq projects available at NCBI for 6 cetacean species: *Tursiops truncatus* (common  
129 bottlenose dolphin), *Delphinapterus leucas* (beluga whale), *Neophocaena asiaeorientalis*  
130 (finless porpoise), *P. catodon* (sperm whale), *Balaenoptera acutorostrata* (common  
131 minke whale), and *B. mysticetus* (supplementary table 2).

132 Overall, RNA-Seq analysis revealed a considerably low number of *Ccl27* mRNA reads  
133 across all the 6 species, especially in *N. asiaeorientalis* (Figure 3). Moreover, for the  
134 remaining species we observed a substantially high proportion of reads spanning adjacent  
135 exonic and intronic regions, exon-intron reads, versus spliced reads, connecting  
136 contiguous exons and containing no intronic remnants, especially in the case of *T.*  
137 *truncatus* (121 exon-intron reads against 3 spliced reads). In the later, the higher number  
138 of skin-specific sequencing runs available for this species, compared to the remaining  
139 ones (25 skin-specific sequencing runs in *T. truncatus* vs. an average of 6.6 skin-specific  
140 sequencing runs per species), probably explains the variation in the number of exon-

141 intron reads (see supplementary table 2). As we observed a specific case with a  
142 considerably distinct ratio of exon-intron reads/spliced reads amongst the remaining  
143 species, namely *B. mysticetus* (49 spliced reads vs 52 exon-intron reads), we decided to  
144 further verify the presence of ORF disruptive mutations in the produced transcripts of  
145 *Ccl27* in each of the referred species. We were able to detect at least one premature stop  
146 codon in the transcripts of the analysed 6 cetacean species (see supplementary material  
147 3), revealing that *Ccl27* transcripts contained the genome predicted ORF mutations  
148 (Figure 3).

149 The conserved mutational pattern observed between Odontoceti and Mysticeti suggests  
150 that *Ccl27* inactivation occurred in the Cetacea ancestor. To further survey and estimate  
151 the approximate timing of *Ccl27* loss in Cetacea, we next investigated the genome and  
152 the skin transcriptome of the extant sister clade of the Cetacea, the Hippopotamidae. The  
153 current version of the *H. amphibius* genome, available at NCBI, is fragmented and  
154 unannotated (GCA\_002995585.1). However, we were able to deduce the full coding ORF  
155 of the *Ccl27* gene orthologue in *H. amphibius*, and without any intervening inactivating  
156 mutation (Figure 3). Furthermore, by examining a skin-specific transcriptome we  
157 identified a very high proportion of spliced/exon-intron mRNA reads (1995 spliced reads  
158 against 379 exon-intron reads), a clear indication that the gene is functional in this species  
159 (Figure 3).

160

### 161 ***Ccl27* is eroded in other non-cetacean mammals**

162 We next investigated the uniqueness of *Ccl27* inactivation in other mammalian lineages  
163 with absent or LQ annotations. Our initial analysis revealed that several genes annotated  
164 as LQ were in fact coding. For example, the analysis of the retrieved genomic sequence  
165 for *L. africana* revealed poor genome coverage in the *Ccl27* locus. However, blast search

166 of the whole genome sequence recovered a genomic scaffold  
167 (NW\_003573426.1:65683000-65687000) that contained an intact *Ccl27* gene sequence.  
168 Yet, in the case of LQ tagged *Ccl27* from *Hipposideros armiger* (great groundleaf bat),  
169 *Trichechus manatus* (West Indian manatee), *Heterocephalus glaber* (naked mole rat), and  
170 *Manis javanica* (Sunda pangolin) the analysis and manual annotation of the  
171 corresponding genomic sequence revealed a number of ORF disrupting mutations (Figure  
172 4A). Our findings were further supported by searching the available unannotated genomes  
173 of *Manis pentadactyla* (Chinese pangolin) and *Rhinolophus sinicus* (Chinese rufous  
174 horseshoe bat), which after annotation also presented a non-coding *Ccl27* ORF (Figure  
175 4A). Briefly, *Ccl27* annotation in *H. armiger* revealed a premature stop codon in exon 3  
176 followed by 1 nucleotide insertion, and in *R. sinicus* a single premature stop codon was  
177 identified in exon 2 (all confirmed by SRA search Supplementary material 4). In the  
178 Pholidota *M. javanica* and *M. pentadactyla* a shared frameshift mutation in exon 2 was  
179 identified (validated by SRA in *M. javanica* Supplementary material 4). Additionally, *M.*  
180 *pentadactyla* presents a premature stop codon in exon 2 while *M. javanica* presents a  
181 premature stop codon in exon 3 preceded by a 1 nucleotide frameshift mutation. In  
182 rodentia, the *Ccl27* gene annotation in *H. glaber* revealed a missing start codon in exon 1  
183 combined with a premature stop codon in exon2, and finally in *T. manatus* *Ccl27* gene  
184 annotation uncovered a premature stop codon in exon 3 (stop codons validated by SRA  
185 Supplementary material 4).

186

### 187 **Exon 3 length reduction parallels gene inactivation**

188 The survey of 112 placental mammalian *Ccl27* CDS exposed a variable C-terminal length  
189 in different mammalian species. Thus, we compared the predicted length of exon 3 in the  
190 annotated pseudogenes regardless of prior ORF disrupting mutations (Figure 4B). This



191 analysis showed that all annotated pseudogenes were severely truncated in exon 3 with  
192 the exception of *R. sinicus*. Also, the analysis of the observed truncations in the overall  
193 structure of CCL27 using homology modelling for *O. orca* and *B. mysticetus* showed that  
194 premature stop codons occur early in the C-terminal  $\alpha$ -helix. CC chemokines present a  
195 highly conserved quaternary structure characterized by disordered N-terminal region  
196 followed by a  $3_{10}$ -helix, 3 antiparallel  $\beta$ -strands, followed a C-terminal  $\alpha$ -helix and ending  
197 with a disordered stretch of positive residues [23]. Interestingly, the C-terminal region,  
198 specifically the disordered region, is a feature that differentiates CCL27 from the majority  
199 of CC chemokines, and has been shown to be involved in nuclear import [9]. In  
200 agreement, both *Ccl27* transcript variants, the intracellular chemokine PESKY and the  
201 internalized CCR10-bound CCL27, target the cell nucleus, modulating morphology and  
202 motility via transcriptional modification [4, 8]. Moreover, the remaining mammals  
203 including Tenricidae, Antilopinae, Caprinae, Platyrrhini, exhibit a sequence deletion  
204 pattern at the end or shortly after the  $\alpha$ -helix (Figure 4B), which implies the loss of the  
205 final C-terminal disordered region involved in nuclear targeting. Yet, contrarily to the  
206 annotated pseudogenes, the coding *Ccl27 Aotus nancymaae*, which presents the shortest  
207 exon 3, still conserves the full  $\alpha$ -helix which has been reported to stabilize the overall fold  
208 [23] (Figure 4C). The biological significance of this plasticity remains to be studied.

209

### 210 ***Ccl27* gene loss correlates with alternative protection and healing programs**

211 Together, our analysis indicates that *Ccl27* is most likely non-functional in all of the  
212 examined cetacean species. Inactivating mutations are also present in species of  
213 Pholidota, Sirenia, Chiroptera, and Rodentia. Even if a full phenotypic description of  
214 mouse knock-out (KO) for this gene is presently unavailable, the initial data suggests a  
215 decrease of the T cell population in intact skin [24]. On the other hand, constitutive

216 production of keratinocyte CCL27 enhanced the inflammatory response in mice [25]. In  
217 agreement, chronic inflammatory skin diseases, such as atopic dermatitis and psoriasis,  
218 are characterized by increased serum levels of the T cell attracting chemokine CCL27  
219 [10], while CCL27-neutralizing antibody treatment reduced skin inflammation in a  
220 transgenic animal model [26]. Thus, upon insult or infection, *Ccl27* KO would likely  
221 show an attenuated inflammatory response in the skin. This hypothesis remains to be  
222 verified.

223 Nevertheless, it could be argued that the premature stop codon in exon 3 of *Ccl27* in *T.*  
224 *truncatus*, *D. leucas*, *S. chinensis* and *N. asiaorientalis* could still encode a functional  
225 shorter isoform. Yet, RNA-Seq transcriptome and structural analysis supports a different  
226 interpretation. Since *Ccl27* prime expression site is the skin, we analysed the available  
227 skin and multi-tissue RNA-transcriptomes from Cetacea and found two distinct scenarios.  
228 First, in the majority of the species, RNA-Seq searches recovered reads covering exon-  
229 intron. Second, in *B. mysticetus* the recovered RNA-Seq reads presented a higher number  
230 of spliced reads. However, in both cases, detailed analysis of the collected reads  
231 confirmed the presence of the previously identified ORF-disrupting mutations. Thus, we  
232 suggest that these mRNA mature sequences do not translate into a functional protein. In  
233 addition, previous studies, addressing the loss of visual opsins in Chiroptera, highlighted  
234 possible discrepancies between gene integrity and protein production: further suggesting  
235 post-transcriptional mechanisms as regulators of evolutionary gene silencing [22].

236 Our analysis strongly supports that *Ccl27* gene pseudogenization compromises both  
237 canonical CCL27 and PESKY transcripts. This is in accordance with previous findings  
238 reporting a distinct inflammatory and wound healing program in cetacean skin [18, 27].  
239 Interestingly, scar-less and low inflammation wound repair has also been reported in  
240 several mammalian foetus, including human, as well as in human adult oral mucosa [28,

241 29]. Both observations might correlate with decreased or null CCL27 secretion. In fact,  
242 embryonic keratinocytes are more proliferative and less immunogenic than adult cells,  
243 inhibiting T cell proliferation [30]. Similarly, oral mucosa exhibits rapid wound healing  
244 due to accelerated re-epithelialization [28]. In wounded oral mucosa, the overall  
245 expression of *Ccl27* is also downregulated when compared to wounded skin [28]. Thus,  
246 in scab-less and low inflammation wound repair, increased epithelial renewal seems to  
247 parallel the downregulation or absence of CCL27 secretion. Yet, in oral mucosa the  
248 possible maintenance of PESKY could participate in the healing circuitry by stimulating  
249 cell migration and proliferation.

250 Additionally, we found convergent inactivation of *Ccl27* in other non-cetacean  
251 mammalian species: namely in pangolins (*M. javanica* and *M. pentadactyla*), in the naked  
252 mole rat (*H. glaber*), in the sirenian *T. manatus*, and in two Chiroptera (*H. armiger* and  
253 *R. sinicus*). Curiously, with the exception of Chiroptera, these species share some of the  
254 distinctive features of Cetacea skin: for example, the hairless phenotype is observed in  
255 Pholidota, Sirenia, and naked mole rat, increased epidermal thickness is observed in  
256 Sirenia and naked mole rat and Sirenia skin is also smooth [14, 31]. The diversity of skin  
257 phenotypes along with the scarce information regarding species-specific inflammatory  
258 and wound healing programs, hampers the anticipation of the possible outcomes of *Ccl27*  
259 pseudogenization. Nonetheless, the available information suggests that *Ccl27* erosion  
260 occurred in species exhibiting singular epidermal renewal, or even protective mechanisms  
261 or structures, reducing the need for CCL27-dependent inflammatory processes. For  
262 instance, pangolins present a protective armour with keratin-derived scales, which was  
263 suggested to reduce epithelial immune requirements [32, 33]. In agreement,  
264 pseudogenization of Interferon Epsilon, which confers protection against viral and  
265 bacterial infections, was also reported in these species [33]. On the other hand, the naked

266 mole rat abundantly produces high molecular weight hyaluronic acid, suggested to  
267 underscore their peculiar longevity and cancer resistance but also contributing to cell  
268 motility, rapid wound healing and immunity [31, 34]. Regarding Chiroptera, although  
269 their skin is generally similar to most mammalian species, interdigital skin membranes  
270 are thinner, and thus more susceptible to damage; yet, interdigital membranes have an  
271 enhanced healing capacity [35]. Nonetheless, the inflammatory circuitry of this healing  
272 process is still poorly studied. Also, *Ccl27* pseudogenization was only detected in two  
273 Chiroptera species. Again, post-translational events could promote CCL27 loss in  
274 additional species [22]. In conclusion, our findings reinforce gene loss mechanisms as  
275 evolutionary drivers of skin phenotypes in mammals, and correlate *Ccl27* loss with  
276 species-specific scar-less and/or low inflammation wound repair.

277

## 278 **Material and Methods**

### 279 **Sequence retrieval**

280 *Ccl27* coding nucleotide sequences were searched and collected from NCBI for a set of  
281 mammalian species representative of the major mammalian lineages (see Supplementary  
282 table 1). Searches were performed through tblastn and blastn queries using the human  
283 *Ccl27* sequence as reference. Full coding sequences and corresponding genomic  
284 sequences were collected, for phylogenetic analysis and gene annotation respectively.  
285 Coding sequences were next uploaded into Geneious R7.1.9 curated by removing 5' and  
286 3' UTR (untranslated regions) and aligned using the translation align option. Sequence  
287 alignment was inspected and exported for phylogenetic analysis. Maximum likelihood  
288 Phylogenetic analysis was performed in PhyML3.0 server [36], with best sequence  
289 evolutionary model determined using smart model selection [37], and branch support with

290 the aBayes algorithm [38]. The resulting phylogenetic tree was then visualized and  
291 analysed in Figtree (Supplementary material 5).

## 292 **Gene annotation**

293 For gene annotation the genomic sequence of *Ccl27* annotations tagged as LQ was  
294 collected from NCBI. For species with no *Ccl27* annotation (*B. acutorostrata*, *O. orca*  
295 and *R. sinicus*), the genomic sequence ranging from the upstream to the downstream  
296 flanking genes was collected. Finally, for species with no annotated genome (*B.*  
297 *bonaerensis*, *E. robustus*, *B. mysticetus*, *H. amphibius* and *M. pentadactyla*), genomic  
298 sequences were recovered through tblastn searches in the whole genome assembly and  
299 scaffold corresponding to the highest identity hits were taken. Collected genomic  
300 sequences were next loaded to Geneious R7.1.9 for manual annotation as previously  
301 described [11, 39]. Briefly, using as reference human and *Bos taurus Ccl27* CDS  
302 sequence as reference each individualized exon was mapped on the corresponding  
303 genomic sequences using the built-in map to reference tool in Geneious R7.1.9. Aligned  
304 regions were manually inspected to verify coding status and identify ORF disrupting  
305 mutations (frameshifts, premature stop codon, loss of canonical splice sites). The  
306 identified mutations were next validated in at least two independent SRA projects (when  
307 available) (see supplementary material 1).

## 308 **Transcriptomic Analysis**

309 RNA-Seq analysis was performed to assess the functional condition of *Ccl27* in 6  
310 cetacean species and *H. amphibius*. For each of the 6 cetaceans, using the discontinuous  
311 megablast task from Blastn, the *B. taurus Ccl27* coding sequence (CDS) was used as  
312 query sequence to recover reads from the totality of the available transcriptomic sequence  
313 read archive (SRA) projects available at NCBI. The supplementary table 2 provides an  
314 in-depth description of the explored NCBI SRA projects per species. In the case of *H.*

315 *amphibius*, through megablast from Blastn, the CDS of the annotated gene in the same  
316 species was used as query sequence and reads were recovered from the available *H.*  
317 *amphibius* skin transcriptome (accession number PRJNA507170). The collected mRNA  
318 reads were mapped against the corresponding annotated gene using the map to reference  
319 tool from Geneious R7.1.9. The aligned regions were manually curated, and poorly  
320 aligning reads manually removed. Next reads were then classified as spliced reads (reads  
321 spanning over two different exons) and exon-intron reads (reads containing intronic  
322 sequence). Reads fully overlapping a single exon, exonic reads, were considered  
323 inconclusive for this analysis, given that it is infeasible to infer the nature of the  
324 corresponding transcript (spliced or unspliced).

### 325 ***Comparative homology modelling***

326 Comparative homology modelling was performed for *O. orca* representative of  
327 Odontoceti, *B. mysticetus* representative of Mysticeti and for *Aotus nancymaae*  
328 (Platyrrhini) representing a coding CDS with short C-terminal. Predicted CDS sequences  
329 of *O. orca* and *B. mysticetus* were determined using the annotated exons and premature  
330 stop codons identified in exon 2 were reverted to the residue observed in *B. taurus*, while  
331 mutations in exon 3 were left as observed. Corresponding protein sequences were then  
332 next submitted to the SWISS-MODEL [40, 41] for homology modelling using the human  
333 CCL27 crystal structure as reference (2KUM) [23]. Resulting models were downloaded  
334 and analysed in PyMOL V1.74 [42].

335

### 336 **Acknowledgments**

337 This work was supported by Project No. 031342 co-financed by COMPETE 2020,  
338 Portugal 2020 and the European Union through the ERDF, and by FCT through national  
339 funds.

340

341 **Competing interests**

342 The authors declare no competing interests.

343 **References**

- 344
- 345 1. Di Meglio P, Perera GK, Nestle FO: **The multitasking organ: recent insights**  
346 **into skin immune function.** *Immunity* 2011, **35**:857-869.
  - 347 2. Pasparakis M, Haase I, Nestle FO: **Mechanisms regulating skin immunity and**  
348 **inflammation.** *Nat Rev Immunol* 2014, **14**:289-301.
  - 349 3. Baird JW, Nibbs RJB, Komai-Koma M, Connolly JA, Ottersbach K, Clark-  
350 Lewis I, Liew FY, Graham GJ: **ESkine, a Novel  $\beta$ -Chemokine, Is**  
351 **Differentially Spliced to Produce Secretable and Nuclear Targeted**  
352 **Isoforms.** *Journal of Biological Chemistry* 1999, **274**:33496-33503.
  - 353 4. Hromas R, Broxmeyer HE, Kim C, Christopherson K, 2nd, Hou YH: **Isolation**  
354 **of ALP, a novel divergent murine CC chemokine with a unique carboxy**  
355 **terminal extension.** *Biochem Biophys Res Commun* 1999, **258**:737-740.
  - 356 5. Ishikawa-Mochizuki I, Kitaura M, Baba M, Nakayama T, Izawa D, Imai T,  
357 Yamada H, Hieshima K, Suzuki R, Nomiyama H, Yoshie O: **Molecular cloning**  
358 **of a novel CC chemokine, interleukin-11 receptor alpha-locus chemokine**  
359 **(ILC), which is located on chromosome 9p13 and a potential homologue of a**  
360 **CC chemokine encoded by mollusum contagiosum virus.** *FEBS Lett* 1999,  
361 **460**:544-548.
  - 362 6. Morales J, Homey B, Vicari AP, Hudak S, Oldham E, Hedrick J, Orozco R,  
363 Copeland NG, Jenkins NA, McEvoy LM, Zlotnik A: **CTACK, a skin-**  
364 **associated chemokine that preferentially attracts skin-homing memory T**  
365 **cells.** *Proceedings of the National Academy of Sciences* 1999, **96**:14470-14475.
  - 366 7. Gortz A, Nibbs RJB, McLean P, Jarmin D, Lambie W, Baird JW, Graham GJ:  
367 **The Chemokine ESkine/CCL27 Displays Novel Modes of Intracrine and**  
368 **Paracrine Function.** *The Journal of Immunology* 2002, **169**:1387-1394.
  - 369 8. Ledee DR, Chen J, Tonelli LH, Takase H, Gery I, Zelenka PS: **Differential**  
370 **expression of splice variants of chemokine CCL27 mRNA in lens, cornea,**  
371 **and retina of the normal mouse eye.** *Mol Vis* 2004, **10**:663-667.
  - 372 9. Nibbs RJ, Graham GJ: **CCL27/PESKY: a novel paradigm for chemokine**  
373 **function.** *Expert Opin Biol Ther* 2003, **3**:15-22.
  - 374 10. Homey B, Alenius H, Muller A, Soto H, Bowman EP, Yuan W, McEvoy L,  
375 Lauerma AI, Assmann T, Bunemann E, et al: **CCL27-CCR10 interactions**  
376 **regulate T cell-mediated skin inflammation.** *Nat Med* 2002, **8**:157-165.
  - 377 11. Lopes-Marques M, Machado AM, Barbosa S, Fonseca MM, Ruivo R, Castro  
378 LFC: **Cetacea are natural knockouts for IL20.** *Immunogenetics* 2018.
  - 379 12. Sharma V, Hecker N, Roscito JG, Foerster L, Langer BE, Hiller M: **A genomics**  
380 **approach reveals insights into the importance of gene losses for mammalian**  
381 **adaptations.** *Nature Communications* 2018, **9**:1215.
  - 382 13. McGowen MR, Gatesy J, Wildman DE: **Molecular evolution tracks**  
383 **macroevolutionary transitions in Cetacea.** *Trends in Ecology & Evolution*  
384 2014, **29**:336-346.
  - 385 14. Sokolov VE: **Comparative morphology of skin of different orders: Ordo**  
386 **Cetacea.** In *Mammal Skin*. Berkeley University of California Press Ltd.; 1982:  
387 284-324



- 388 15. Mouton M, Botha A: *Cutaneous Lesions in Cetaceans: An Indicator of*  
389 *Ecosystem Status?*; 2012.
- 390 16. Spearman RI: **The epidermal stratum corneum of the whale.** *J Anat* 1972,  
391 **113**:373-381.
- 392 17. Hicks BD, St Aubin DJ, Geraci JR, Brown WR: **Epidermal growth in the**  
393 **bottlenose dolphin, *Tursiops truncatus*.** *J Invest Dermatol* 1985, **85**:60-63.
- 394 18. Zabka TS, Romano TA: **Distribution of MHC II (+) cells in skin of the**  
395 **Atlantic bottlenose dolphin (*Tursiops truncatus*): An initial investigation of**  
396 **dolphin dendritic cells.** *The Anatomical Record Part A: Discoveries in*  
397 *Molecular, Cellular, and Evolutionary Biology* 2003, **273A**:636-647.
- 398 19. Albalat R, Canestro C: **Evolution by gene loss.** *Nat Rev Genet* 2016, **17**:379-  
399 391.
- 400 20. Strasser B, Mlitz V, Fischer H, Tschachler E, Eckhart L: **Comparative**  
401 **genomics reveals conservation of filaggrin and loss of caspase-14 in**  
402 **dolphins.** *Exp Dermatol* 2015, **24**:365-369.
- 403 21. Lachner J, Mlitz V, Tschachler E, Eckhart L: **Epidermal cornification is**  
404 **preceded by the expression of a keratinocyte-specific set of pyroptosis-**  
405 **related genes.** *Scientific Reports* 2017, **7**:17446.
- 406 22. Sadier A, Davies KTJ, Yohe LR, Yun K, Donat P, Hedrick BP, Dumont ER,  
407 Dávalos LM, Rossiter SJ, Sears KE: **Multifactorial processes underlie parallel**  
408 **opsin loss in neotropical bats.** *eLife* 2018, **7**:e37412.
- 409 23. Jansma AL, Kirkpatrick JP, Hsu AR, Handel TM, Nietlispach D: **NMR analysis**  
410 **of the structure, dynamics, and unique oligomerization properties of the**  
411 **chemokine CCL27.** *J Biol Chem* 2010, **285**:14424-14437.
- 412 24. Davila ML, Fu Y, Yang J, Xiong N: **Role of CCR10 and CCL27 in skin**  
413 **resident T cell development and homeostasis.** *The Journal of Immunology*  
414 2016, **196**:137.137-137.137.
- 415 25. Kagami S, Saeki H, Tsunemi Y, Nakamura K, Kuwano Y, Komine M,  
416 Nakayama T, Yoshie O, Tamaki K: **CCL27-transgenic mice show enhanced**  
417 **contact hypersensitivity to Th2, but not Th1 stimuli.** *Eur J Immunol* 2008,  
418 **38**:647-657.
- 419 26. Chen L, Lin SX, Agha-Majzoub R, Overbergh L, Mathieu C, Chan LS: **CCL27**  
420 **is a critical factor for the development of atopic dermatitis in the keratin-14**  
421 **IL-4 transgenic mouse model.** *Int Immunol* 2006, **18**:1233-1242.
- 422 27. Zasloff M: **Observations on the Remarkable (and Mysterious) Wound-**  
423 **Healing Process of the Bottlenose Dolphin.** *Journal of Investigative*  
424 *Dermatology* 2011, **131**:2503-2505.
- 425 28. Iglesias-Bartolome R, Uchiyama A, Molinolo AA, Abusleme L, Brooks SR,  
426 Callejas-Valera JL, Edwards D, Doci C, Asselin-Labat M-L, Onaitis MW, et al:  
427 **Transcriptional signature primes human oral mucosa for rapid wound**  
428 **healing.** *Science Translational Medicine* 2018, **10**.
- 429 29. Moore AL, Marshall CD, Barnes LA, Murphy MP, Ransom RC, Longaker MT:  
430 **Scarless wound healing: Transitioning from fetal research to regenerative**  
431 **healing.** *Wiley Interdiscip Rev Dev Biol* 2018, **7**.
- 432 30. Tan Kenneth KB, Salgado G, Connolly John E, Chan Jerry KY, Lane EB:  
433 **Characterization of Fetal Keratinocytes, Showing Enhanced Stem Cell-Like**  
434 **Properties: A Potential Source of Cells for Skin Reconstruction.** *Stem Cell*  
435 *Reports* 2014, **3**:324-338.



- 436 31. Daly TJ, Buffenstein R: **Skin morphology and its role in thermoregulation in**  
437 **mole-rats, *Heterocephalus glaber* and *Cryptomys hottentotus*.** *J Anat* 1998,  
438 **193 ( Pt 4):495-502.**
- 439 32. Meyer W, Liamsiricharoen M, Suprasert A, Fleischer LG, Hewicker-Trautwein  
440 M: **Immunohistochemical demonstration of keratins in the epidermal layers**  
441 **of the Malayan pangolin (*Manis javanica*), with remarks on the evolution of**  
442 **the integumental scale armour.** *European journal of histochemistry : EJH*  
443 2013, **57:e27-e27.**
- 444 33. Choo SW, Rayko M, Tan TK, Hari R, Komissarov A, Wee WY, Yurchenko  
445 AA, Kliver S, Tamazian G, Antunes A, et al: **Pangolin genomes and the**  
446 **evolution of mammalian scales and immunity.** *Genome research* 2016,  
447 **26:1312-1322.**
- 448 34. Fisher GJ: **Cancer resistance, high molecular weight hyaluronic acid, and**  
449 **longevity.** *Journal of cell communication and signaling* 2015, **9:91-92.**
- 450 35. Ceballos-Vasquez A, Caldwell JR, Faure PA: **Seasonal and reproductive**  
451 **effects on wound healing in the flight membranes of captive big brown bats.**  
452 *Biology Open* 2015, **4:95.**
- 453 36. Guindon S, Dufayard JF, Lefort V, Anisimova M, Hordijk W, Gascuel O: **New**  
454 **Algorithms and Methods to Estimate Maximum-Likelihood Phylogenies:**  
455 **Assessing the Performance of PhyML 3.0.** *Systematic Biology* 2010, **59:307-**  
456 **21.**
- 457 37. Vincent Lefort, Jean-Emmanuel Longueville, Olivier Gascuel: **SMS: Smart**  
458 **Model Selection in PhyML.** *Molecular Biology and Evolution* 2017, **34:2422-**  
459 **2424.**
- 460 38. Anisimova M, Gil M, Dufayard JF, Dessimoz C, Gascuel O: **aBayes: Survey of**  
461 **branch support methods demonstrates accuracy, power, and robustness of**  
462 **fast likelihood-based approximation schemes.** *Systematic Biology* 2011,  
463 **60:685-99.**
- 464 39. Lopes-Marques M, Ruivo R, Fonseca E, Teixeira A, Castro LFC: **Unusual loss**  
465 **of chymosin in mammalian lineages parallels neo-natal immune transfer**  
466 **strategies.** *Mol Phylogenet Evol* 2017, **116:78-86.**
- 467 40. Waterhouse A, Bertoni M, Bienert S, Studer G, Tauriello G, Gumienny R, Heer  
468 FT, de Beer TAP, Rempfer C, Bordoli L, et al: **SWISS-MODEL: homology**  
469 **modelling of protein structures and complexes.** *Nucleic Acids Res* 2018,  
470 **46:W296-w303.**
- 471 41. Benkert P, Biasini M, Schwede T: **Toward the estimation of the absolute**  
472 **quality of individual protein structure models.** *Bioinformatics* 2011, **27:343-**  
473 **350.**
- 474 42. Schrodinger L: **The PyMOL Molecular Graphics System.** 2010.

475

476

477

478

479

480

481

482

483 **Figures**

484

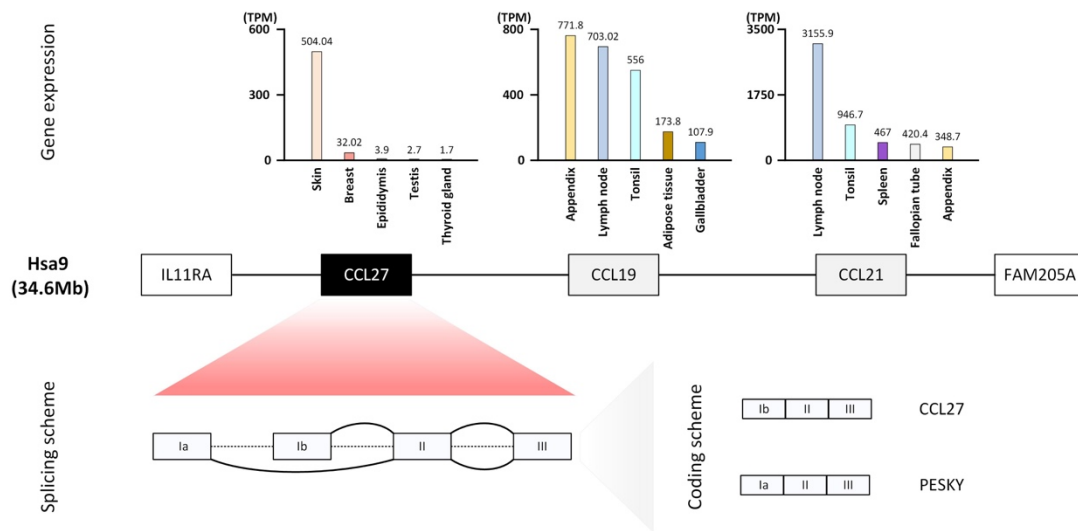

485

486 **Figure 1:** The human orthologue *Ccl27* gene expression, genomic *locus* and structure. In  
 487 the centre, the genomic region of *Homo sapiens* at chromosome 9, containing *Ccl27* gene  
 488 (in black box) and tandem gene duplicates, *Ccl19* and *Ccl21* (grey boxes). The  
 489 corresponding *Ccl* gene expression data was retrieved directly from the Human Protein  
 490 Atlas (<https://www.proteinatlas.org/>). Only five tissues with the highest values of  
 491 transcripts per million (TPM) are represented. Bottom figure represents *Ccl27* gene  
 492 structure and alternative splicing producing two transcripts: CCL27 and PESKY.

493

494

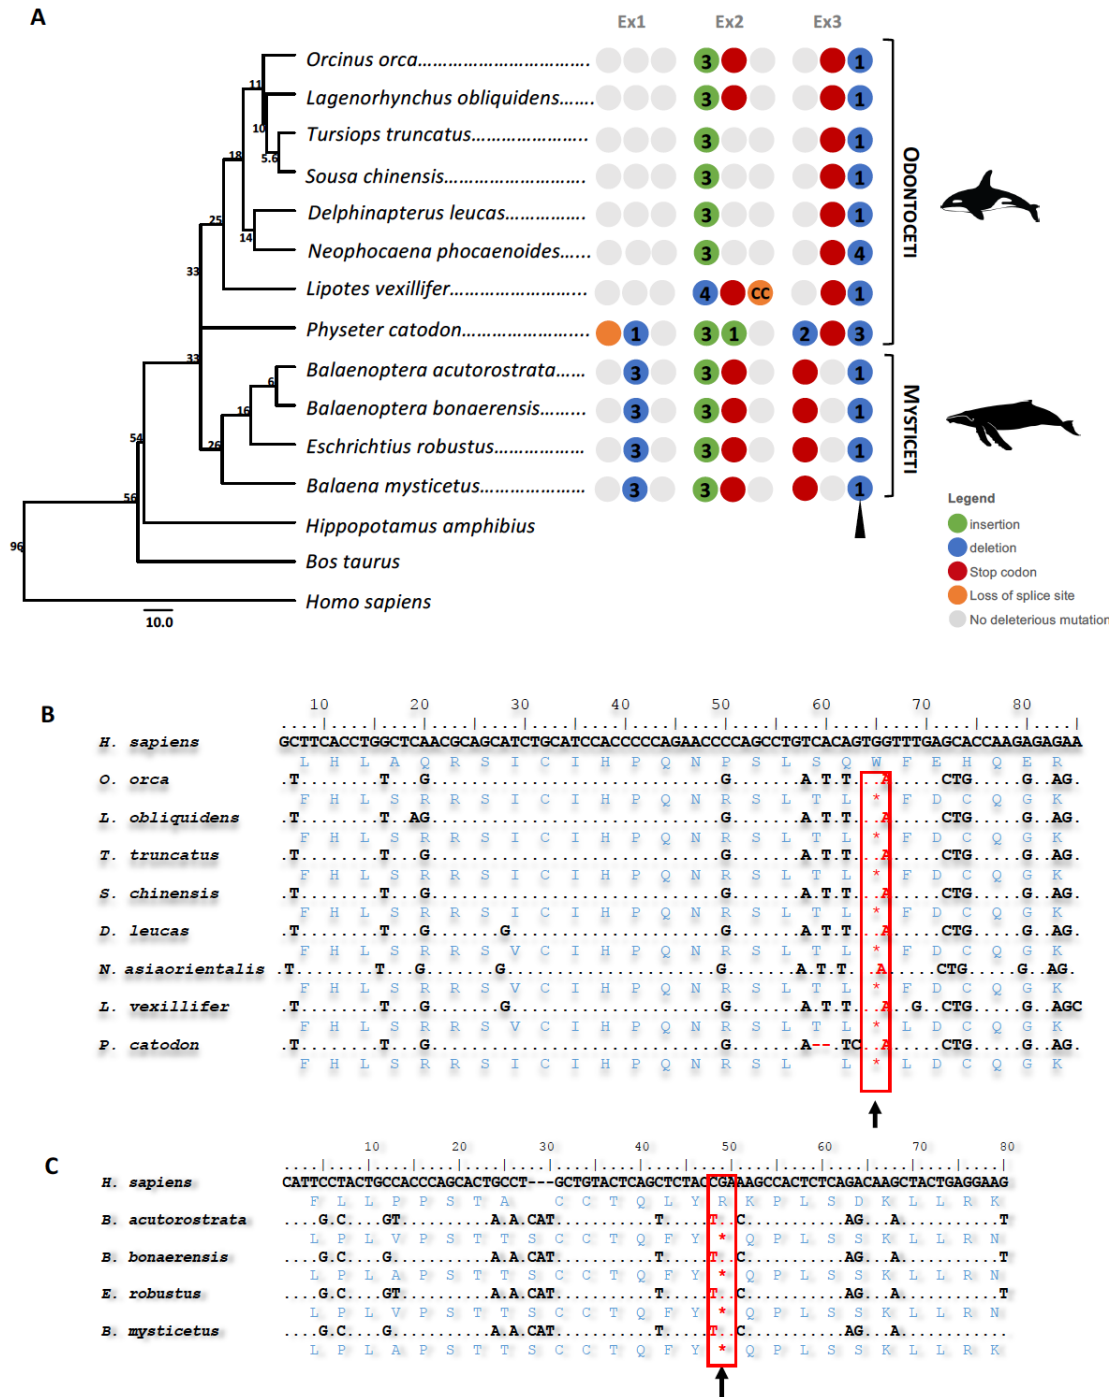

495

496 **Figure 2:** A- Schematic representation of the *Ccl27* gene and identified mutations in  
 497 Cetacea, each group of 3 circles represents one exon, red represents stop codon; orange,  
 498 non AG-GT splice site; blue deletion and green nucleotide insertion; numbers at tree  
 499 nodes indicate million years. Number in the circles indicate number of nucleotides  
 500 inserted or deleted and dark grey circles represent regions or exon not found. B- Sequence  
 501 alignment of the identified premature stop codon in exon 3 of Odontoceti. C- Sequence  
 502 alignment of the identified premature stop codon in exon 2 of Mysticeti.

503

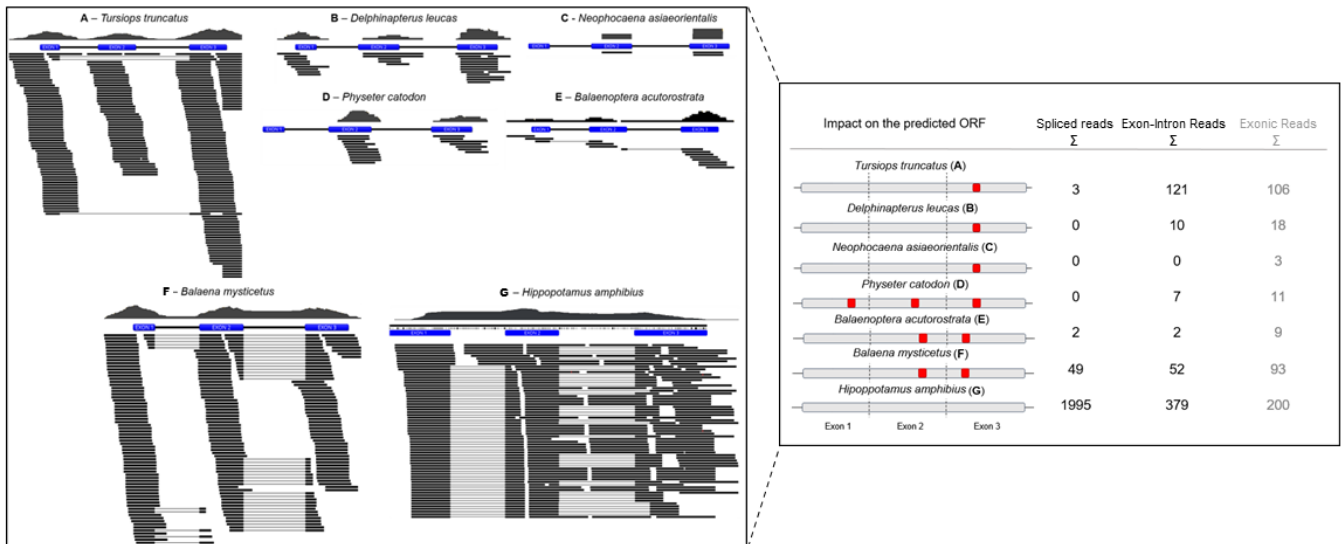

504  
 505 **Figure 3:** Gene expression of *Ccl27* across Cetacea species. In the left box: mapping of  
 506 the NCBI Sequence Read Archive (SRA) recovered multi-tissue RNA-Seq reads (black)  
 507 for each of the 7 represented species against the corresponding *Ccl27* annotated gene  
 508 (blue). Right box: impact of the annotated mutations in the open reading frame (ORF) of  
 509 the *Ccl27* gene. Premature stop codons are represented with a red squared marker at the  
 510 corresponding exon. Overall count of RNA-Seq mapped reads for each specie. Reads are  
 511 classified into spliced reads (reads spanning over two different exons), exon-intron reads  
 512 (reads containing exonic and intronic sequence) and exonic reads (reads fully overlapping  
 513 exonic regions).  
 514  
 515

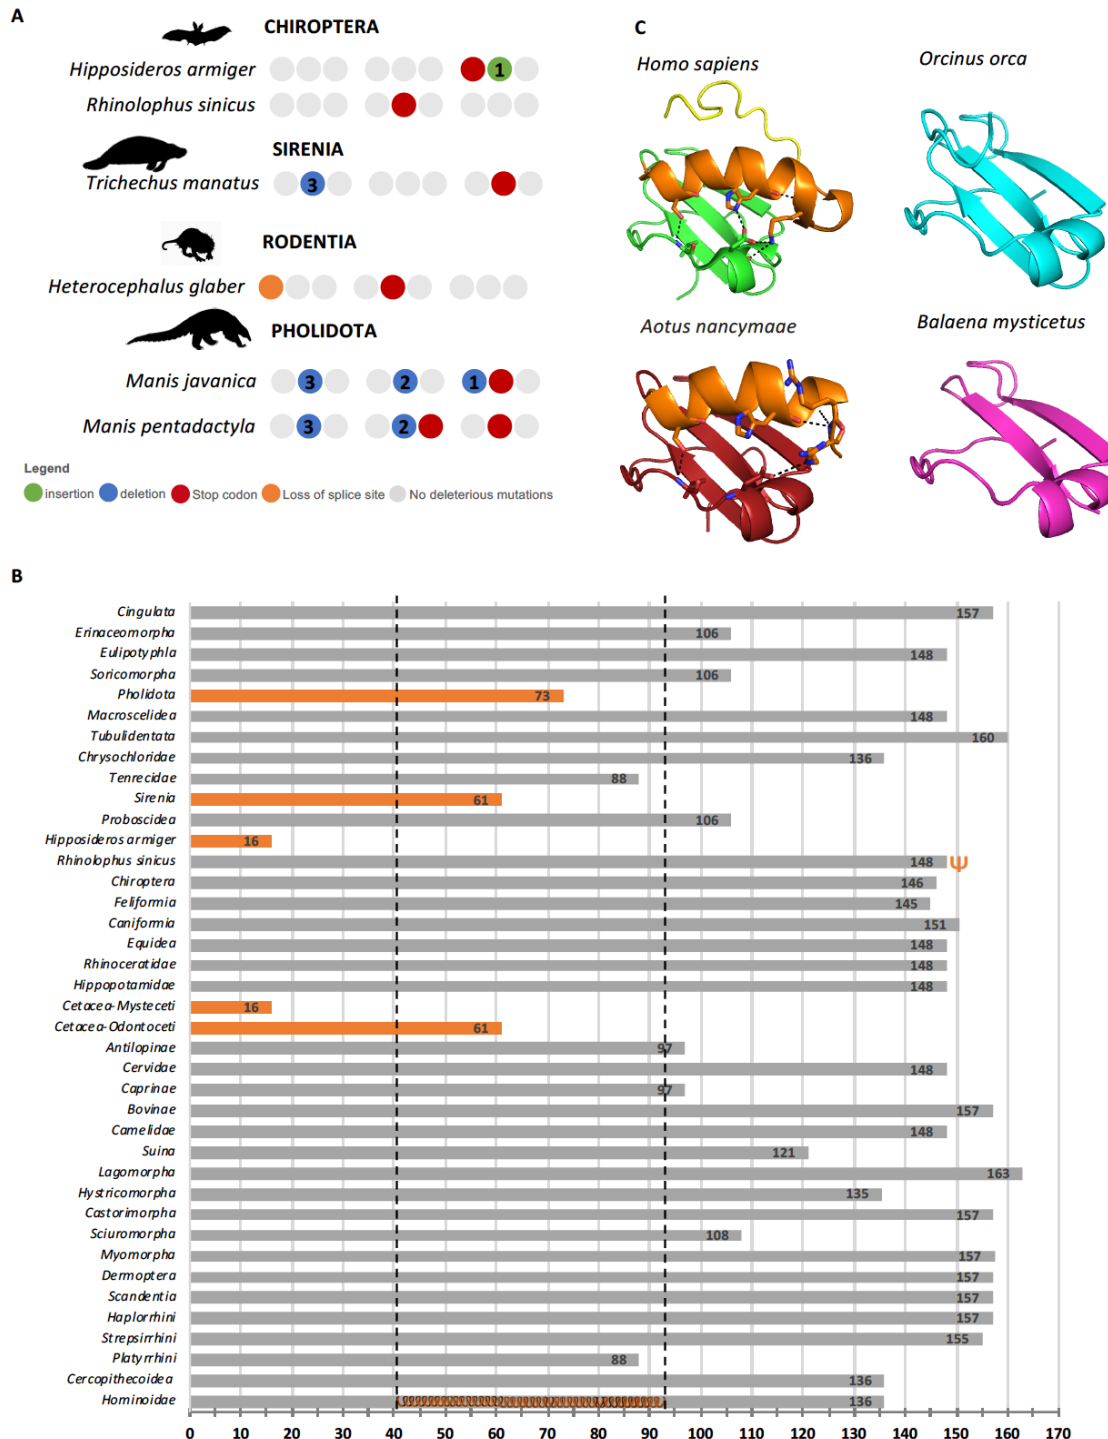

516

517

518

519

520

521

522

523

**Figure 4:** A- Gene annotation of *Ccl7* in non-cetacean mammals. B- Analysis of exon3 length in nucleotides, orange bars highlights species with severe exon 3 truncation, orange helix in Hominoidae bar corresponds to extension C-terminal  $\alpha$ -helix in human crystal structure (2KUM). C- Comparative analysis of the human crystal structure 2KUM (green) and calculated homology models in red *Aotus nancymaae*, blue *Orcinus orca* and magenta *Balaena mysticetus*. Structural features highlighted in human in orange terminal  $\alpha$ -helix, in yellow disordered terminal region.

524 **Supplementary Information Legends**

525

526 **Supplementary Table 1:** Accession numbers of the analysed sequences \* tagged low-  
527 quality, <sup>a</sup> assembled genomes without annotation.

528 **Supplementary Table 2:** In-depth description of the available transcriptomic NCBI  
529 sequence read archive (SRA) projects, scrutinized in the transcriptomic analysis of the 6  
530 represented cetaceans.

531 **Supplementary Material 1:** SRA validation of the identified mutations in Cetacea

532 **Supplementary Material 2:** Sequence alignment of *Ccl27* exon 3 from Cetacea, *H.*  
533 *amphibius* and *H. sapiens*.

534 **Supplementary Material 3:** SRA validation of inactivating mutations of *Ccl27*  
535 transcripts in Cetacea.

536 **Supplementary Material 4:** SRA Validation of identified mutations in other mammals.

537 **Supplementary Material 5:** Distribution and phylogenetic analysis of coding *Ccl27* in  
538 mammals.
